# Supplementary material for: Mutation of GmIPK1 Gene Using CRISPR/Cas9 Reduced Phytic Acid Content in Soybean Seeds
Source: MDPI journal article supplement (doi:10.3390/ijms231810583), 2022-09-13
Supplement: s1 [file s1]

## Supplementary materials

IJMS, Song *et al.*

| sgRNA-1 induced T <sub>0</sub> plants |                                                                                             | Types                         | Reads # | Indel % |
|---------------------------------------|---------------------------------------------------------------------------------------------|-------------------------------|---------|---------|
| NT                                    | CTCCTCTTCAGACAAGGAAATAGT <b><u>TGGT</u></b> CAACTATATGTGCAGCATGTTATGAAGCCTTTGCTTGGTCCAACTC  |                               |         |         |
| T <sub>0</sub> #4                     | CTCCTCTTCAGACAAGGAA--AGT <b><u>TGGT</u></b> CAACTATATGTGCAGCATGTTATGAAGCCTTTGCTTGGTCCAACTC  | 2 bp deletion (Out of frame)  | 3013    | 12.15   |
|                                       | CTCCTCTTCAGACAAGG---AGT <b><u>TGGT</u></b> CAACTATATGTGCAGCATGTTATGAAGCCTTTGCTTGGTCCAACTC   | 3 bp deletion                 | 1978    | 7.98    |
|                                       | CTCCTCTTCAGACAAGG---AGT <b><u>TGGT</u></b> CAACTATATGTGCAGCATGTTATGAAGCCTTTGCTTGGTCCAACTC   | 4 bp deletion (Out of frame)  | 1519    | 6.13    |
|                                       | CTCCTCTTCAGACAAGG---TAGT <b><u>TGGT</u></b> CAACTATATGTGCAGCATGTTATGAAGCCTTTGCTTGGTCCAACTC  | 3 bp deletion                 | 1028    | 4.15    |
|                                       | CTCCTCTTCAGACA---AGT <b><u>TGGT</u></b> CAACTATATGTGCAGCATGTTATGAAGCCTTTGCTTGGTCCAACTC      | 7 bp deletion (Out of frame)  | 687     | 2.77    |
|                                       | CTCCTCTTCAGACAAG---G <b><u>TGGT</u></b> CAACTATATGTGCAGCATGTTATGAAGCCTTTGCTTGGTCCAACTC      | 6 bp deletion                 | 433     | 1.75    |
|                                       | CTCCTCTTCAGAC---AGT <b><u>TGGT</u></b> CAACTATATGTGCAGCATGTTATGAAGCCTTTGCTTGGTCCAACTC       | 8 bp deletion (Out of frame)  | 372     | 1.50    |
|                                       | CTCCTCTTCAGACAAGGAAA--AGT <b><u>TGGT</u></b> CAACTATATGTGCAGCATGTTATGAAGCCTTTGCTTGGTCCAACTC | 1 bp deletion (Out of frame)  | 362     | 1.46    |
|                                       | CTCCTCTTCAGACAAGG---ATAGT <b><u>TGGT</u></b> CAACTATATGTGCAGCATGTTATGAAGCCTTTGCTTGGTCCAACTC | 2 bp deletion (Out of frame)  | 345     | 1.39    |
|                                       | CTCCTCTTCAGACA---AGT <b><u>TGGT</u></b> CAACTATATGTGCAGCATGTTATGAAGCCTTTGCTTGGTCCAACTC      | 6 bp deletion                 | 283     | 1.49    |
|                                       | CTCCTCTTCAGACAAGGAAATAGT <b><u>TGGT</u></b> CAACTATATGTGCAGCATGTTATGAAGCCTTTGCTTGGTCCAACTC  | 1 bp insertion (Out of frame) | 865     | 3.49    |
| T <sub>0</sub> #10                    | CTCCTCTTCAGACAAGG---AGT <b><u>TGGT</u></b> CAACTATATGTGCAGCATGTTATGAAGCCTTTGCTTGGTCCAACTC   | 4 bp deletion (Out of frame)  | 10879   | 42.32   |
|                                       | CTCCTCTTCAGACAAGG---TAGT <b><u>TGGT</u></b> CAACTATATGTGCAGCATGTTATGAAGCCTTTGCTTGGTCCAACTC  | 3 bp deletion (Out of frame)  | 10777   | 41.92   |
| T <sub>0</sub> #12                    | CTCCTCTTCAGACAAGGAA--AGT <b><u>TGGT</u></b> CAACTATATGTGCAGCATGTTATGAAGCCTTTGCTTGGTCCAACTC  | 2 bp deletion (Out of frame)  | 3370    | 11.52   |
|                                       | CTCCTCTTCAGACAAGGAA--AGT <b><u>TGGT</u></b> CAACTATATGTGCAGCATGTTATGAAGCCTTTGCTTGGTCCAACTC  | 3 bp deletion                 | 1927    | 6.59    |
|                                       | CTCCTCTTCAGACAAGG---AGT <b><u>TGGT</u></b> CAACTATATGTGCAGCATGTTATGAAGCCTTTGCTTGGTCCAACTC   | 4 bp deletion (Out of frame)  | 1754    | 6.00    |
|                                       | CTCCTCTTCAGACAAGG---TAGT <b><u>TGGT</u></b> CAACTATATGTGCAGCATGTTATGAAGCCTTTGCTTGGTCCAACTC  | 3 bp deletion                 | 1080    | 3.69    |
|                                       | CTCCTCTTCAGACA---AGT <b><u>TGGT</u></b> CAACTATATGTGCAGCATGTTATGAAGCCTTTGCTTGGTCCAACTC      | 7 bp deletion (Out of frame)  | 790     | 2.70    |
|                                       | CTCCTCTTCAGACAAGGAAATAGT <b><u>TGGT</u></b> CAACTATATGTGCAGCATGTTATGAAGCCTTTGCTTGGTCCAACTC  | 1 bp insertion (Out of frame) | 658     | 2.25    |
| T <sub>0</sub> #13                    | CTCCTCTTCAGACAAGGAA--AGT <b><u>TGGT</u></b> CAACTATATGTGCAGCATGTTATGAAGCCTTTGCTTGGTCCAACTC  | 2 bp deletion (Out of frame)  | 1968    | 6.31    |
|                                       | CTCCTCTTCAGACAAGGAA--AGT <b><u>TGGT</u></b> CAACTATATGTGCAGCATGTTATGAAGCCTTTGCTTGGTCCAACTC  | 3 bp deletion                 | 1185    | 3.81    |
|                                       | CTCCTCTTCAGACAAGG---AGT <b><u>TGGT</u></b> CAACTATATGTGCAGCATGTTATGAAGCCTTTGCTTGGTCCAACTC   | 4 bp deletion (Out of frame)  | 883     | 2.84    |
|                                       | CTCCTCTTCAGACAAGG---TAGT <b><u>TGGT</u></b> CAACTATATGTGCAGCATGTTATGAAGCCTTTGCTTGGTCCAACTC  | 3 bp deletion                 | 405     | 1.30    |
|                                       | CTCCTCTTCAGACA---AGT <b><u>TGGT</u></b> CAACTATATGTGCAGCATGTTATGAAGCCTTTGCTTGGTCCAACTC      | 7 bp deletion (Out of frame)  | 399     | 1.28    |
|                                       | CTCCTCTTCAGAC---AGT <b><u>TGGT</u></b> CAACTATATGTGCAGCATGTTATGAAGCCTTTGCTTGGTCCAACTC       | 8 bp deletion (Out of frame)  | 270     | 0.87    |
|                                       | CTCCTCTTCAGACAAGGAAATAGT <b><u>TGGT</u></b> CAACTATATGTGCAGCATGTTATGAAGCCTTTGCTTGGTCCAACTC  | 1 bp insertion (Out of frame) | 268     | 0.86    |

**Figure S1. Inheritability of CRISPR/Cas9-induced mutations in *GmIPK1* gene-edited transgenic soybean plants (T<sub>0</sub>) targeted by *GmIPK1* sgRNA-1.** Four sgRNA-1 induced GE T<sub>0</sub> plants (Table S1) with high mutation ratios are presented. The mutation ratio (indel %) was calculated by dividing the number of reads containing indels at the target site (reads #) by the total number of sequencing reads. Protospacer adjacent motif (PAM) sequences (NGG) are shown in bold and underlined. Insertions and deletions are represented by the red and green hyphens, respectively.

# sgRNA-4 induced T<sub>0</sub> plants

|                    |                                                                             | Types                         | Reads # | Indel % |
|--------------------|-----------------------------------------------------------------------------|-------------------------------|---------|---------|
| NT                 | GGTGAACCAAGGAAATTCCTTGAAGTGGTTGAGAAGAAATGTTCTGGTCAACGTCTCGGTGGCGAGTTGAAGCTG |                               |         |         |
| T <sub>0</sub> #1  | GGTGACCAAGGAAATTC-----AGTGGTTGAGAAGAAATGTTCTGGTCAACGTCTCGGTGGCGAGTTGAAGCTG  | 4 bp deletion (Out of frame)  | 2064    | 15.30   |
|                    | GGTGACCAAGGAAAT-----AGTGGTTGAGAAGAAATGTTCTGGTCAACGTCTCGGTGGCGAGTTGAAGCTG    | 6 bp deletion                 | 1341    | 9.99    |
|                    | GGTGACCAAGGAAAT-----AGTGGTTGAGAAGAAATGTTCTGGTCAACGTCTCGGTGGCGAGTTGAAGCTG    | 5 bp deletion (Out of frame)  | 1274    | 9.49    |
|                    | GGTGACCAAGGAA-----AGTGGTTGAGAAGAAATGTTCTGGTCAACGTCTCGGTGGCGAGTTGAAGCTG      | 8 bp deletion (Out of frame)  | 859     | 6.40    |
|                    | GGTGACCAAGGAAATTCCT--AGTGGTTGAGAAGAAATGTTCTGGTCAACGTCTCGGTGGCGAGTTGAAGCTG   | 2 bp deletion (Out of frame)  | 514     | 3.83    |
| T <sub>0</sub> #5  | GGTGACCAAGGAAATTCCTTGAAGTGGTTGAGAAGAAATGTTCTGGTCAACGTCTCGGTGGCGAGTTGAAGCTG  | 1 bp insertion (Out of frame) | 483     | 3.60    |
|                    | GGTGACCAAGGAA-----AGTGGTTGAGAAGAAATGTTCTGGTCAACGTCTCGGTGGCGAGTTGAAGCTG      | 8 bp deletion (Out of frame)  | 222     | 1.60    |
|                    | GGTGACCAAGGAAAT-----AGTGGTTGAGAAGAAATGTTCTGGTCAACGTCTCGGTGGCGAGTTGAAGCTG    | 6 bp deletion                 | 194     | 1.40    |
|                    | GGTGACCAAGGAAATTCCT--AGTGGTTGAGAAGAAATGTTCTGGTCAACGTCTCGGTGGCGAGTTGAAGCTG   | 2 bp deletion (Out of frame)  | 153     | 1.10    |
|                    | GGTGACCAAGGAAATTC-----AGTGGTTGAGAAGAAATGTTCTGGTCAACGTCTCGGTGGCGAGTTGAAGCTG  | 4 bp deletion (Out of frame)  | 123     | 0.89    |
| T <sub>0</sub> #20 | GGTGACCAAGG-----GAGTGGTTGAGAAGAAATGTTCTGGTCAACGTCTCGGTGGCGAGTTGAAGCTG       | 9 bp deletion                 | 101     | 0.73    |
|                    | GGTGACCAAGGAAATTCCTT--AGTGGTTGAGAAGAAATGTTCTGGTCAACGTCTCGGTGGCGAGTTGAAGCTG  | 1 bp deletion (Out of frame)  | 75      | 0.54    |
|                    | GGTGACCAAGGAAATTCCTTGAAGTGGTTGAGAAGAAATGTTCTGGTCAACGTCTCGGTGGCGAGTTGAAGCTG  | 1 bp insertion (Out of frame) | 72      | 0.52    |
|                    | GGTGACCAAGGAA-----AGTGGTTGAGAAGAAATGTTCTGGTCAACGTCTCGGTGGCGAGTTGAAGCTG      | 8 bp deletion (Out of frame)  | 1051    | 4.29    |
|                    | GGTGACCAAGGAAAT-----AGTGGTTGAGAAGAAATGTTCTGGTCAACGTCTCGGTGGCGAGTTGAAGCTG    | 6 bp deletion                 | 889     | 3.63    |
| T <sub>0</sub> #21 | GGTGACCAAGG-----GAGTGGTTGAGAAGAAATGTTCTGGTCAACGTCTCGGTGGCGAGTTGAAGCTG       | 9 bp deletion                 | 710     | 2.90    |
|                    | GGTGACCAAGGAAATTC-----AGTGGTTGAGAAGAAATGTTCTGGTCAACGTCTCGGTGGCGAGTTGAAGCTG  | 4 bp deletion (Out of frame)  | 620     | 2.53    |
|                    | GGTGACCAAGGAAATTCCT--AGTGGTTGAGAAGAAATGTTCTGGTCAACGTCTCGGTGGCGAGTTGAAGCTG   | 2 bp deletion (Out of frame)  | 489     | 2.00    |
|                    | GGTGACCAAGGAAAT-----AGTGGTTGAGAAGAAATGTTCTGGTCAACGTCTCGGTGGCGAGTTGAAGCTG    | 5 bp deletion (Out of frame)  | 436     | 1.78    |
|                    | GGTGACCAAGGAAATTC-----AGTGGTTGAGAAGAAATGTTCTGGTCAACGTCTCGGTGGCGAGTTGAAGCTG  | 3 bp deletion                 | 425     | 1.74    |
| T <sub>0</sub> #21 | GGTGACCAAGGAAATTCCTT--AGTGGTTGAGAAGAAATGTTCTGGTCAACGTCTCGGTGGCGAGTTGAAGCTG  | 1 bp deletion (Out of frame)  | 334     | 1.36    |
|                    | GGTGACCAAGGAAATTCCTTGAAGTGGTTGAGAAGAAATGTTCTGGTCAACGTCTCGGTGGCGAGTTGAAGCTG  | 1 bp insertion (Out of frame) | 223     | 0.91    |
|                    | GGTGACCAAGGAAATTC-----AGTGGTTGAGAAGAAATGTTCTGGTCAACGTCTCGGTGGCGAGTTGAAGCTG  | 5 bp deletion (Out of frame)  | 11181   | 41.54   |
|                    | GGTGACCAAGGAA-----AGTGGTTGAGAAGAAATGTTCTGGTCAACGTCTCGGTGGCGAGTTGAAGCTG      | 8 bp deletion (Out of frame)  | 6       | 0.02    |
|                    | GGTGACCAAGGAAAT-----AGTGGTTGAGAAGAAATGTTCTGGTCAACGTCTCGGTGGCGAGTTGAAGCTG    | 5 bp deletion (Out of frame)  | 5       | 0.02    |
| T <sub>0</sub> #21 | GGTGACCAAGGAAATTCCTTGAAGTGGTTGAGAAGAAATGTTCTGGTCAACGTCTCGGTGGCGAGTTGAAGCTG  | 1 bp insertion (Out of frame) | 10985   | 41.81   |
|                    | GGTGACCAAGGAAATTCCTTGAAGTGGTTGAGAAGAAATGTTCTGGTCAACGTCTCGGTGGCGAGTTGAAGCTG  | 1 bp insertion (Out of frame) | 6       | 0.02    |
|                    | GGTGACCAAGGAAATTCCTTGAAGTGGTTGAGAAGAAATGTTCTGGTCAACGTCTCGGTGGCGAGTTGAAGCTG  | 1 bp insertion (Out of frame) | 2       | 0.01    |

**Figure S2. Inheritability of CRISPR/Cas9-induced mutations in *GmIPK1* gene-edited transgenic soybean plants (T<sub>0</sub>) targeted by *GmIPK1* sgRNA-4.** Four of sgRNA-4 induced GE T<sub>0</sub> plants (Table S2) with high mutation ratios are shown. The mutation ratio (Indel %) was calculated by dividing the number of reads containing indels at the target site (Reads #) by the number of total sequencing reads. The protospacer adjacent motif (PAM) sequences (NGG) are bold and underlined. Insertions and deletions are represented by red font and green hyphens, respectively.

**Table S1. Indel (insertion and deletion) ratio (%) in *Gmipk1* sgRNA-1 induced T<sub>0</sub> plants**

|     | Total reads | Insertions | Deletions | Indel frequencies (%) |
|-----|-------------|------------|-----------|-----------------------|
| NT  | 39145       | 16         | 696       | 712 (1.8%)            |
| #2  | 21134       | 23         | 2010      | 2033 (9.6%)           |
| #3  | 31317       | 0          | 44        | 44 (0.1%)             |
| #4  | 24790       | 1021       | 15053     | 16074 (64.8%)         |
| #5  | 25518       | 223        | 4293      | 4516 (17.7%)          |
| #6  | 25290       | 0          | 2480      | 2480 (9.8%)           |
| #7  | 30426       | 6          | 495       | 501 (1.6%)            |
| #10 | 25709       | 6          | 21674     | 21680 (84.3%)         |
| #12 | 29256       | 760        | 16093     | 16853 (57.6%)         |
| #13 | 31124       | 323        | 8771      | 9094 (29.2%)          |

**Table S2. Indel (insertion and deletion) ratio (%) in *Gmipk1* sgRNA-4 induced T<sub>0</sub> plants**

|     | Total reads | Insertions | Deletions | Indel frequencies (%) |
|-----|-------------|------------|-----------|-----------------------|
| NT  | 18391       | 0          | 20        | 20 (0.1%)             |
| #1  | 13429       | 620        | 9162      | 9782 (72.8%)          |
| #2  | 27943       | 3          | 83        | 86 (0.3%)             |
| #3  | 10128       | 19         | 289       | 308 (3.0%)            |
| #5  | 14213       | 107        | 1712      | 1819 (12.8%)          |
| #20 | 27268       | 376        | 9489      | 9865 (36.2%)          |
| #21 | 26867       | 10974      | 11190     | 22164 (82.5%)         |

**Table S3. Sequence analysis of mutations for the *GmIPK1* gene and its homologs in *Gmipk1* sgRNA-4 GE plants (T<sub>2</sub>). The mismatched nucleotides between *GmIPK1* (*Glyma14g07880*) and the homologous genes (*Glyma06g03310* and *Glyma04g03240*) in *Gmipk1* sgRNA-4 GE plants (T<sub>2</sub>) are marked in red, and the PAM sequences (NGG) are indicated in bold.**

| GE plants (T <sub>1</sub> ) | <i>Glyma14g07880</i><br>Indel frequencies (%) | Patterns       | GE plants (T <sub>2</sub> ) | <i>Glyma14g07880</i><br>Indel frequencies (%) | <i>Glyma06g03310</i><br>Indel frequencies (%) | <i>Glyma04g03240</i><br>Indel frequencies (%) |
|-----------------------------|-----------------------------------------------|----------------|-----------------------------|-----------------------------------------------|-----------------------------------------------|-----------------------------------------------|
| NT                          | 5 (0.0)                                       |                | NT                          | 77 (0.2)                                      | 0 (0.0)                                       | 0 (0.0)                                       |
|                             |                                               |                | #21-2-1                     | 41977 (100.0)                                 | 0 (0.0)                                       | 0 (0.0)                                       |
| #21-2                       | 18503 (100.0)                                 | 5 bp deletion  | #21-2-2                     | 46488 (99.9)                                  | 0 (0.0)                                       | 0 (0.0)                                       |
|                             |                                               |                | #21-2-3                     | 49816 (100.0)                                 | 0 (0.0)                                       | 0 (0.0)                                       |
|                             |                                               |                | #21-2-4                     | 48124 (99.9)                                  | 0 (0.0)                                       | 0 (0.0)                                       |
| #21-3                       | 24306 (100.0)                                 | 1 bp insertion | #21-3-1                     | 49410 (99.7)                                  | 0 (0.0)                                       | 0 (0.0)                                       |
|                             |                                               |                | #21-3-2                     | 47478 (99.5)                                  | 0 (0.0)                                       | 0 (0.0)                                       |

  

| Homologous genes                       | <i>GmIPK1</i> sgRNA-4 target sequence and its potential target sequences |
|----------------------------------------|--------------------------------------------------------------------------|
| <i>Glyma14g07880</i> ( <i>GmIPK1</i> ) | GACCAGGGAATTCCTTGAG <b>TTGG</b>                                          |
| <i>Glyma06g03310</i>                   | GCC <b>A</b> AGGGAATT <b>TC</b> CGA <b>ATTGG</b>                         |
| <i>Glyma04g03240</i>                   | GT <b>CA</b> AGGGAATT <b>TC</b> CGA <b>ATTGG</b>                         |
